# Supplementary material
Source: PubMed Central journal article supplement (PMC8411300)
Supplement: NIHMS1716517-supplement-tS1.pdf [file NIHMS1716517-supplement-tS1.pdf]

**Table S1 Proteomic identification of proteins in GFP Ab immunoprecipitate from whole cell lysate of HEK293 cells expressing KCNQ1-GFP and HA-KCNE1-dsR**

| #  | Uniprot-Accession | Short Name                                      | Ratio of $\Sigma$ PSM <sup>a</sup> [ + ] <sup>b</sup> / [ - ] <sup>c</sup> | $\Sigma$ PSM [ + ] | $\Sigma$ PSM [ - ] | Gene Symbol |
|----|-------------------|-------------------------------------------------|----------------------------------------------------------------------------|--------------------|--------------------|-------------|
| 1  | P29966            | Myristoylated alanine-rich C-kinase substrate   |                                                                            | 8                  | 0                  | MARCS       |
| 2  | P13797            | Plastin-3                                       |                                                                            | 7                  | 0                  | PLST        |
| 3  | Q86YZ3            | Hornerin                                        |                                                                            | 7                  | 0                  | HORN        |
| 4  | P50990            | T-complex protein 1 subunit theta               |                                                                            | 6                  | 0                  | TCPQ        |
| 5  | P15531            | Nucleoside diphosphate kinase A                 |                                                                            | 6                  | 0                  | NDKA        |
| 6  | P35580            | Myosin-10                                       |                                                                            | 6                  | 0                  | MYH10       |
| 7  | Q01581            | Hydroxymethylglutaryl-CoA synthase, cytoplasmic |                                                                            | 6                  | 0                  | HMCS1       |
| 8  | O75955            | Flotillin-1                                     |                                                                            | 6                  | 0                  | FLOT1       |
| 9  | P80723            | Brain acid soluble protein 1                    |                                                                            | 5                  | 0                  | BASP1       |
| 10 | P48681            | Nestin                                          |                                                                            | 5                  | 0                  | NEST        |
| 11 | Q06830            | Peroxiredoxin-1                                 |                                                                            | 5                  | 0                  | PRDX1       |
| 12 | O43707            | Alpha-actinin-4                                 |                                                                            | 4                  | 0                  | ACTN4       |
| 13 | O43175            | D-3-phosphoglycerate dehydrogenase              |                                                                            | 4                  | 0                  | SERA        |
| 14 | P09874            | Poly [ADP-ribose] polymerase 1                  |                                                                            | 4                  | 0                  | PARP1       |
| 15 | P15259            | Phosphoglycerate mutase 2                       |                                                                            | 3                  | 0                  | PGAM2       |
| 16 | P27824            | Calnexin                                        |                                                                            | 3                  | 0                  | CALX        |
| 17 | O94905            | Erlin-2                                         |                                                                            | 3                  | 0                  | ERLN2       |
| 18 | P31943            | Heterogeneous nuclear ribonucleoprotein H       |                                                                            | 3                  | 0                  | HNRH1       |
| 19 | P53396            | ATP-citrate synthase                            |                                                                            | 3                  | 0                  | ACLY        |
| 20 | P27797            | Calreticulin                                    |                                                                            | 2                  | 0                  | CALR        |
| 21 | P07737            | Profilin-1                                      |                                                                            | 2                  | 0                  | PROF1       |
| 22 | P31948            | Stress-induced-phosphoprotein 1                 |                                                                            | 2                  | 0                  | STIP1       |
| 23 | P46940            | Ras GTPase-activating-like protein IQGAP1       |                                                                            | 2                  | 0                  | IQGA1       |
| 24 | Q13162            | Peroxiredoxin-4                                 |                                                                            | 2                  | 0                  | PRDX4       |
| 25 | P11940            | Polyadenylate-binding protein 1                 |                                                                            | 2                  | 0                  | PABP1       |
| 26 | P18206            | Vinculin                                        |                                                                            | 2                  | 0                  | VINC        |
| 27 | P61981            | 14-3-3 protein gamma                            |                                                                            | 2                  | 0                  | 1433G       |
| 28 | Q9Y266            | Nuclear migration protein nudC                  |                                                                            | 2                  | 0                  | NUDC        |
| 29 | A6NIZ1            | Ras-related protein Rap-1b-like protein         |                                                                            | 2                  | 0                  | RP1BL       |
| 30 | P04083            | Annexin A1                                      |                                                                            | 2                  | 0                  | ANXA1       |
| 31 | P11586            | C-1-tetrahydrofolate synthase, cytoplasmic      |                                                                            | 2                  | 0                  | C1TC        |
| 32 | P12956            | X-ray repair cross-complementing protein 6      |                                                                            | 2                  | 0                  | XRCC6       |
| 33 | P04181            | Ornithine aminotransferase, mitochondrial       |                                                                            | 2                  | 0                  | OAT         |
| 34 | P24752            | Acetyl-CoA acetyltransferase, mitochondrial     |                                                                            | 2                  | 0                  | THIL        |

|    |        |                                                                                   |      |     |    |       |
|----|--------|-----------------------------------------------------------------------------------|------|-----|----|-------|
| 35 | P33176 | Kinesin-1 heavy chain                                                             |      | 2   | 0  | KINH  |
| 36 | P48643 | T-complex protein 1 subunit epsilon                                               |      | 2   | 0  | TCPE  |
| 37 | P55209 | Nucleosome assembly protein 1-like 1                                              |      | 2   | 0  | NP1L1 |
| 38 | Q99733 | Nucleosome assembly protein 1-like 4                                              |      | 2   | 0  | NP1L4 |
| 39 | Q15084 | Protein disulfide-isomerase A6                                                    |      | 2   | 0  | PDIA6 |
| 40 | Q99798 | Aconitate hydratase, mitochondrial                                                |      | 2   | 0  | ACON  |
| 41 | O00299 | Chloride intracellular channel protein 1                                          |      | 2   | 0  | CLIC1 |
| 42 | Q96P63 | Serpin B12                                                                        |      | 2   | 0  | SPB12 |
| 43 | P50454 | Serpin H1                                                                         |      | 2   | 0  | SERPH |
| 44 | P61088 | Ubiquitin-conjugating enzyme E2 N                                                 |      | 2   | 0  | UBE2N |
| 45 | P63244 | Guanine nucleotide-binding protein subunit beta-2-like 1                          |      | 2   | 0  | GBLP  |
| 46 | Q9H668 | CST complex subunit STN1                                                          |      | 2   | 0  | STN1  |
| 47 | P30153 | Serine/threonine-protein phosphatase 2A 65 kDa regulatory subunit A alpha isoform |      | 2   | 0  | 2AAA  |
| 48 | P34932 | Heat shock 70 kDa protein 4                                                       |      | 2   | 0  | HSP74 |
| 49 | Q9UNM6 | 26S proteasome non-ATPase regulatory subunit 13                                   |      | 2   | 0  | PSD13 |
| 50 | Q92841 | Probable ATP-dependent RNA helicase DDX17                                         |      | 2   | 0  | DDX17 |
| 51 | Q562R1 | Beta-actin-like protein 2                                                         | 15.3 | 46  | 3  | ACTBL |
| 52 | P06576 | ATP synthase subunit beta, mitochondrial                                          | 12.0 | 12  | 1  | ATPB  |
| 53 | P68032 | Actin, alpha cardiac muscle 1                                                     | 9.0  | 126 | 14 | ACTC  |
| 54 | P60709 | Actin, cytoplasmic 1                                                              | 8.8  | 229 | 26 | ACTB  |
| 55 | P68104 | Elongation factor 1-alpha 1                                                       | 7.0  | 14  | 2  | EF1A1 |
| 56 | P68363 | Tubulin alpha-1B chain                                                            | 6.4  | 32  | 5  | TBA1B |
| 57 | P21333 | Filamin-A                                                                         | 6.4  | 89  | 14 | FLNA  |
| 58 | P13639 | Elongation factor 2                                                               | 6.0  | 6   | 1  | EF2   |
| 59 | P23526 | Adenosylhomocysteinase                                                            | 6.0  | 6   | 1  | SAHH  |
| 60 | P23396 | 40S ribosomal protein S3                                                          | 5.0  | 5   | 1  | RS3   |
| 61 | P37802 | Transgelin-2                                                                      | 5.0  | 5   | 1  | TAGL2 |
| 62 | P05023 | Sodium/potassium-transporting ATPase subunit alpha-1                              | 5.0  | 5   | 1  | AT1A1 |
| 63 | Q6UWP8 | Suprabasin                                                                        | 5.0  | 5   | 1  | SBSN  |
| 64 | P14618 | Pyruvate kinase PKM                                                               | 5.0  | 10  | 2  | KPYM  |
| 65 | P15924 | Desmoplakin                                                                       | 4.7  | 28  | 6  | DESP  |
| 66 | P04075 | Fructose-bisphosphate aldolase A                                                  | 4.5  | 9   | 2  | ALDOA |
| 67 | Q00610 | Clathrin heavy chain 1                                                            | 4.5  | 9   | 2  | CLH1  |
| 68 | P06733 | Alpha-enolase                                                                     | 4.5  | 9   | 2  | ENOA  |
| 69 | P35579 | Myosin-9                                                                          | 4.3  | 17  | 4  | MYH9  |
| 70 | Q02413 | Desmoglein-1                                                                      | 4.3  | 17  | 4  | DSG1  |
| 71 | P12277 | Creatine kinase B-type                                                            | 4.0  | 4   | 1  | KCRB  |
| 72 | Q01469 | Fatty acid-binding protein, epidermal                                             | 4.0  | 4   | 1  | FABP5 |
| 73 | Q99623 | Prohibitin-2                                                                      | 4.0  | 4   | 1  | PHB2  |
| 74 | Q00839 | Heterogeneous nuclear ribonucleoprotein U                                         | 4.0  | 4   | 1  | HNRPU |

|     |        |                                                      |     |    |    |       |
|-----|--------|------------------------------------------------------|-----|----|----|-------|
| 75  | P06744 | Glucose-6-phosphate isomerase                        | 4.0 | 8  | 2  | G6PI  |
| 76  | P60842 | Eukaryotic initiation factor 4A-I                    | 4.0 | 8  | 2  | IF4A1 |
| 77  | P04406 | Glyceraldehyde-3-phosphate dehydrogenase             | 3.8 | 15 | 4  | G3P   |
| 78  | Q08554 | Desmocollin-1                                        | 3.8 | 15 | 4  | DSC1  |
| 79  | P08107 | Heat shock 70 kDa protein 1A/1B                      | 3.8 | 30 | 8  | HSP71 |
| 80  | P27348 | 14-3-3 protein theta                                 | 3.7 | 11 | 3  | 1433T |
| 81  | P51148 | Ras-related protein Rab-5C                           | 3.5 | 7  | 2  | RAB5C |
| 82  | P07195 | L-lactate dehydrogenase B chain                      | 3.3 | 20 | 6  | LDHB  |
| 83  | P08238 | Heat shock protein HSP 90-beta                       | 3.1 | 59 | 19 | HS90B |
| 84  | P17987 | T-complex protein 1 subunit alpha                    | 3.0 | 3  | 1  | TCPA  |
| 85  | Q99832 | T-complex protein 1 subunit eta                      | 3.0 | 3  | 1  | TCPH  |
| 86  | P26640 | Valine--tRNA ligase                                  | 3.0 | 3  | 1  | SYVC  |
| 87  | Q15691 | Microtubule-associated protein RP/EB family member 1 | 3.0 | 3  | 1  | MARE1 |
| 88  | P22314 | Ubiquitin-like modifier-activating enzyme 1          | 3.0 | 3  | 1  | UBA1  |
| 89  | Q9Y490 | Talin-1                                              | 3.0 | 3  | 1  | TLN1  |
| 90  | Q13509 | Tubulin beta-3 chain                                 | 3.0 | 9  | 3  | TBB3  |
| 91  | P60174 | Triosephosphate isomerase                            | 3.0 | 9  | 3  | TPIS  |
| 92  | P11142 | Heat shock cognate 71 kDa protein                    | 2.7 | 35 | 13 | HSP7C |
| 93  | P07900 | Heat shock protein HSP 90-alpha                      | 2.7 | 43 | 16 | HS90A |
| 94  | Q13885 | Tubulin beta-2A chain                                | 2.7 | 24 | 9  | TBB2A |
| 95  | P14625 | Endoplasmin                                          | 2.6 | 13 | 5  | ENPL  |
| 96  | P62258 | 14-3-3 protein epsilon                               | 2.6 | 13 | 5  | 1433E |
| 97  | P07237 | Protein disulfide-isomerase                          | 2.5 | 5  | 2  | PDIA1 |
| 98  | Q13263 | Transcription intermediary factor 1-beta             | 2.5 | 5  | 2  | TIF1B |
| 99  | Q14697 | Neutral alpha-glucosidase AB                         | 2.5 | 5  | 2  | GANAB |
| 100 | P07437 | Tubulin beta chain                                   | 2.4 | 39 | 16 | TBB5  |
| 101 | P11021 | 78 kDa glucose-regulated protein                     | 2.3 | 16 | 7  | GRP78 |
| 102 | P07355 | Annexin A2                                           | 2.2 | 11 | 5  | ANXA2 |
| 103 | P63104 | 14-3-3 protein zeta/delta                            | 2.2 | 13 | 6  | 1433Z |
| 104 | P04040 | Catalase                                             | 2.0 | 2  | 1  | CATA  |
| 105 | Q9Y2J2 | Band 4.1-like protein 3                              | 2.0 | 4  | 2  | E41L3 |
| 106 | P07814 | Bifunctional glutamate/proline--tRNA ligase          | 2.0 | 4  | 2  | SYEP  |
| 107 | P31946 | 14-3-3 protein beta/alpha                            | 2.0 | 4  | 2  | 1433B |
| 108 | P25705 | ATP synthase subunit alpha, mitochondrial            | 2.0 | 8  | 4  | ATPA  |
| 109 | P30101 | Protein disulfide-isomerase A3                       | 2.0 | 8  | 4  | PDIA3 |

a:  $\Sigma$ PSM: Sum of peptide-spectrum matches.

b: [+]: Positive immunoprecipitate from whole cell lysates of HEK293 cells expressing Q1-GFP/HA-E1-dsR with GFP rabbit and goat antibodies.

c: [-]: Negative immunoprecipitate from whole cell lysates of untransfected HEK293 cells under the same conditions as positive immunoprecipitate.
