# Supplementary material
Source: PubMed Central journal article supplement (PMC8411300)
Supplement: NIHMS1716517-supplement-tS2.pdf [file NIHMS1716517-supplement-tS2.pdf]

**Table S2 Proteomic identification of proteins in dsRed Ab immunoprecipitate from whole cell lysate of HEK293 cells expressing KCNQ1-GFP and HA-KCNE1-dsR**

| #  | Uniprot-Accession | Short Name                                               | Ratio of $\Sigma$ PSM <sup>a</sup> [ + ] <sup>b</sup> / [ - ] <sup>c</sup> | $\Sigma$ PSM [ + ] | $\Sigma$ PSM [ - ] | Gene Symbol |
|----|-------------------|----------------------------------------------------------|----------------------------------------------------------------------------|--------------------|--------------------|-------------|
| 1  | P08670            | Vimentin                                                 |                                                                            | 17                 | 0                  | VIME        |
| 2  | P15924            | Desmoplakin                                              |                                                                            | 17                 | 0                  | DESP        |
| 3  | P13797            | Plastin-3                                                |                                                                            | 7                  | 0                  | PLST        |
| 4  | P80723            | Brain acid soluble protein 1                             |                                                                            | 5                  | 0                  | BASP1       |
| 5  | P13639            | Elongation factor 2                                      |                                                                            | 5                  | 0                  | EF2         |
| 6  | P06733            | Alpha-enolase                                            |                                                                            | 5                  | 0                  | ENOA        |
| 7  | O43707            | Alpha-actinin-4                                          |                                                                            | 4                  | 0                  | ACTN4       |
| 8  | O43175            | D-3-phosphoglycerate dehydrogenase                       |                                                                            | 4                  | 0                  | SERA        |
| 9  | P42704            | Leucine-rich PPR motif-containing protein, mitochondrial |                                                                            | 4                  | 0                  | LPPRC       |
| 10 | Q13263            | Transcription intermediary factor 1-beta                 |                                                                            | 4                  | 0                  | TIF1B       |
| 11 | P0CG48            | Polyubiquitin-C                                          |                                                                            | 4                  | 0                  | UBC         |
| 12 | P23396            | 40S ribosomal protein S3                                 |                                                                            | 3                  | 0                  | RS3         |
| 13 | O96005            | Cleft lip and palate transmembrane protein 1             |                                                                            | 3                  | 0                  | CLPT1       |
| 14 | Q01469            | Fatty acid-binding protein, epidermal                    |                                                                            | 3                  | 0                  | FABP5       |
| 15 | Q00325            | Phosphate carrier protein, mitochondrial                 |                                                                            | 3                  | 0                  | MPCP        |
| 16 | Q99832            | T-complex protein 1 subunit eta                          |                                                                            | 3                  | 0                  | TCPH        |
| 17 | P26640            | Valine--tRNA ligase                                      |                                                                            | 3                  | 0                  | SYVC        |
| 18 | O75390            | Citrate synthase, mitochondrial                          |                                                                            | 3                  | 0                  | CISY        |
| 19 | Q9UJZ1            | Stomatin-like protein 2, mitochondrial                   |                                                                            | 3                  | 0                  | STML2       |
| 20 | Q12931            | Heat shock protein 75 kDa, mitochondrial                 |                                                                            | 3                  | 0                  | TRAP1       |
| 21 | P49411            | Elongation factor Tu, mitochondrial                      |                                                                            | 3                  | 0                  | EFTU        |
| 22 | P49368            | T-complex protein 1 subunit gamma                        |                                                                            | 3                  | 0                  | TCPG        |
| 23 | P00505            | Aspartate aminotransferase, mitochondrial                |                                                                            | 3                  | 0                  | AATM        |
| 24 | P04632            | Calpain small subunit 1                                  |                                                                            | 2                  | 0                  | CPNS1       |
| 25 | P04040            | Catalase                                                 |                                                                            | 2                  | 0                  | CATA        |
| 26 | P23528            | Cofilin-1                                                |                                                                            | 2                  | 0                  | COF1        |
| 27 | P27797            | Calreticulin                                             |                                                                            | 2                  | 0                  | CALR        |
| 28 | P24534            | Elongation factor 1-beta                                 |                                                                            | 2                  | 0                  | EF1B        |
| 29 | P12277            | Creatine kinase B-type                                   |                                                                            | 2                  | 0                  | KCRB        |
| 30 | P01610            | Ig kappa chain V-I region WEA                            |                                                                            | 2                  | 0                  | KV118       |
| 31 | P05455            | Lupus La protein                                         |                                                                            | 2                  | 0                  | LA          |
| 32 | P19474            | E3 ubiquitin-protein ligase TRIM21                       |                                                                            | 2                  | 0                  | RO52        |
| 33 | P10599            | Thioredoxin                                              |                                                                            | 2                  | 0                  | THIO        |
| 34 | P47929            | Galectin-7                                               |                                                                            | 2                  | 0                  | LEG7        |

|    |        |                                                                          |       |     |    |       |
|----|--------|--------------------------------------------------------------------------|-------|-----|----|-------|
| 35 | Q01581 | Hydroxymethylglutaryl-CoA synthase, cytoplasmic                          |       | 2   | 0  | HMCS1 |
| 36 | Q13162 | Peroxiredoxin-4                                                          |       | 2   | 0  | PRDX4 |
| 37 | P11940 | Polyadenylate-binding protein 1                                          |       | 2   | 0  | PABP1 |
| 38 | O75955 | Flotillin-1                                                              |       | 2   | 0  | FLOT1 |
| 39 | P61026 | Ras-related protein Rab-10                                               |       | 2   | 0  | RAB10 |
| 40 | P60660 | Myosin light polypeptide 6                                               |       | 2   | 0  | MYL6  |
| 41 | P40222 | Alpha-taxilin                                                            |       | 2   | 0  | TXLNA |
| 42 | Q99623 | Prohibitin-2                                                             |       | 2   | 0  | PHB2  |
| 43 | O43837 | Isocitrate dehydrogenase [NAD] subunit beta, mitochondrial               |       | 2   | 0  | IDH3B |
| 44 | P58107 | Epiplakin                                                                |       | 2   | 0  | EPIPL |
| 45 | O75396 | Vesicle-trafficking protein SEC22b                                       |       | 2   | 0  | SC22B |
| 46 | P11586 | C-1-tetrahydrofolate synthase, cytoplasmic                               |       | 2   | 0  | C1TC  |
| 47 | P04843 | Dolichyl-diphosphooligosaccharide--protein glycosyltransferase subunit 1 |       | 2   | 0  | RPN1  |
| 48 | P35232 | Prohibitin                                                               |       | 2   | 0  | PHB   |
| 49 | P55209 | Nucleosome assembly protein 1-like 1                                     |       | 2   | 0  | NP1L1 |
| 50 | Q15084 | Protein disulfide-isomerase A6                                           |       | 2   | 0  | PDIA6 |
| 51 | Q13835 | Plakophilin-1                                                            |       | 2   | 0  | PKP1  |
| 52 | P22314 | Ubiquitin-like modifier-activating enzyme 1                              |       | 2   | 0  | UBA1  |
| 53 | Q562R1 | Beta-actin-like protein 2                                                | 32.00 | 32  | 1  | ACTBL |
| 54 | P35579 | Myosin-9                                                                 | 15.00 | 15  | 1  | MYH9  |
| 55 | P21333 | Filamin-A                                                                | 12.14 | 85  | 7  | FLNA  |
| 56 | P60709 | Actin, cytoplasmic 1                                                     | 9.59  | 163 | 17 | ACTB  |
| 57 | P68032 | Actin, alpha cardiac muscle 1                                            | 8.80  | 88  | 10 | ACTC  |
| 58 | P06576 | ATP synthase subunit beta, mitochondrial                                 | 8.00  | 8   | 1  | ATPB  |
| 59 | Q13509 | Tubulin beta-3 chain                                                     | 7.50  | 15  | 2  | TBB3  |
| 60 | Q13885 | Tubulin beta-2A chain                                                    | 7.33  | 22  | 3  | TBB2A |
| 61 | P48681 | Nestin                                                                   | 7.00  | 7   | 1  | NEST  |
| 62 | P68104 | Elongation factor 1-alpha 1                                              | 6.50  | 13  | 2  | EF1A1 |
| 63 | P27348 | 14-3-3 protein theta                                                     | 6.00  | 6   | 1  | 1433T |
| 64 | P68363 | Tubulin alpha-1B chain                                                   | 5.83  | 35  | 6  | TBA1B |
| 65 | P04406 | Glyceraldehyde-3-phosphate dehydrogenase                                 | 5.50  | 11  | 2  | G3P   |
| 66 | P51148 | Ras-related protein Rab-5C                                               | 5.00  | 5   | 1  | RAB5C |
| 67 | P29966 | Myristoylated alanine-rich C-kinase substrate                            | 5.00  | 5   | 1  | MARCS |
| 68 | P61978 | Heterogeneous nuclear ribonucleoprotein K                                | 5.00  | 5   | 1  | HNRPK |
| 69 | Q06830 | Peroxiredoxin-1                                                          | 5.00  | 5   | 1  | PRDX1 |
| 70 | P68371 | Tubulin beta-4B chain                                                    | 5.00  | 25  | 5  | TBB4B |
| 71 | P50990 | T-complex protein 1 subunit theta                                        | 4.50  | 9   | 2  | TCPQ  |

|     |        |                                                      |      |    |    |       |
|-----|--------|------------------------------------------------------|------|----|----|-------|
| 72  | P10809 | 60 kDa heat shock protein, mitochondrial             | 4.33 | 13 | 3  | CH60  |
| 73  | P17987 | T-complex protein 1 subunit alpha                    | 4.00 | 4  | 1  | TCPA  |
| 74  | P07237 | Protein disulfide-isomerase                          | 4.00 | 4  | 1  | PDIA1 |
| 75  | Q14697 | Neutral alpha-glucosidase AB                         | 4.00 | 4  | 1  | GANAB |
| 76  | P25705 | ATP synthase subunit alpha, mitochondrial            | 4.00 | 8  | 2  | ATPA  |
| 77  | Q14974 | Importin subunit beta-1                              | 4.00 | 8  | 2  | IMB1  |
| 78  | P11021 | 78 kDa glucose-regulated protein                     | 4.00 | 12 | 3  | GRP78 |
| 79  | Q02413 | Desmoglein-1                                         | 4.00 | 12 | 3  | DSG1  |
| 80  | P07437 | Tubulin beta chain                                   | 3.67 | 33 | 9  | TBB5  |
| 81  | P14618 | Pyruvate kinase PKM                                  | 3.50 | 7  | 2  | KPYM  |
| 82  | P38646 | Stress-70 protein, mitochondrial                     | 3.50 | 7  | 2  | GRP75 |
| 83  | P60842 | Eukaryotic initiation factor 4A-I                    | 3.50 | 7  | 2  | IF4A1 |
| 84  | P14625 | Endoplasmic reticulum chaperonin                     | 3.33 | 10 | 3  | ENPL  |
| 85  | P08107 | Heat shock 70 kDa protein 1A/1B                      | 3.33 | 20 | 6  | HSP71 |
| 86  | P11142 | Heat shock cognate 71 kDa protein                    | 3.17 | 19 | 6  | HSP7C |
| 87  | P15531 | Nucleoside diphosphate kinase A                      | 3.00 | 3  | 1  | NDKA  |
| 88  | P35580 | Myosin-10                                            | 3.00 | 3  | 1  | MYH10 |
| 89  | P08865 | 40S ribosomal protein SA                             | 3.00 | 3  | 1  | RSSA  |
| 90  | P78371 | T-complex protein 1 subunit beta                     | 3.00 | 3  | 1  | TCPB  |
| 91  | P23526 | Adenosylhomocysteinase                               | 3.00 | 3  | 1  | SAHH  |
| 92  | P07814 | Bifunctional glutamate/proline--tRNA ligase          | 3.00 | 3  | 1  | SYEP  |
| 93  | P06744 | Glucose-6-phosphate isomerase                        | 3.00 | 6  | 2  | G6PI  |
| 94  | P62258 | 14-3-3 protein epsilon                               | 3.00 | 6  | 2  | 1433E |
| 95  | P07195 | L-lactate dehydrogenase B chain                      | 2.80 | 14 | 5  | LDHB  |
| 96  | P08238 | Heat shock protein HSP 90-beta                       | 2.79 | 39 | 14 | HS90B |
| 97  | P49327 | Fatty acid synthase                                  | 2.75 | 11 | 4  | FAS   |
| 98  | P01857 | Ig gamma-1 chain C region                            | 2.60 | 13 | 5  | IGHG1 |
| 99  | P63104 | 14-3-3 protein zeta/delta                            | 2.50 | 5  | 2  | 1433Z |
| 100 | P26641 | Elongation factor 1-gamma                            | 2.25 | 9  | 4  | EF1G  |
| 101 | P12235 | ADP/ATP translocase 1                                | 2.00 | 2  | 1  | ADT1  |
| 102 | P39019 | 40S ribosomal protein S19                            | 2.00 | 2  | 1  | RS19  |
| 103 | Q9Y2J2 | Band 4.1-like protein 3                              | 2.00 | 2  | 1  | E41L3 |
| 104 | P05023 | Sodium/potassium-transporting ATPase subunit alpha-1 | 2.00 | 2  | 1  | AT1A1 |
| 105 | P04075 | Fructose-bisphosphate aldolase A                     | 2.00 | 4  | 2  | ALDOA |
| 106 | Q08554 | Desmocollin-1                                        | 2.00 | 4  | 2  | DSC1  |
| 107 | P60174 | Triosephosphate isomerase                            | 2.00 | 4  | 2  | TPIS  |
| 108 | P07355 | Annexin A2                                           | 2.00 | 4  | 2  | ANXA2 |
| 109 | Q15366 | Poly(rC)-binding protein 2                           | 2.00 | 4  | 2  | PCBP2 |

a:  $\Sigma$ PSM: Sum of peptide-spectrum matches.

b: [+]: Positive immunoprecipitate from whole cell lysates of HEK293 cells expressing Q1-GFP/HA-E1-dsR with dsRed rabbit antibody.

c: [-]: Negative immunoprecipitate from whole cell lysates of untransfected HEK293 cells under the same conditions as positive immunoprecipitate.
